# Supplementary material
Source: PubMed Central journal article supplement (PMC3050519)
Supplement: NIHMS273928-supplement-1_si_001.pdf [file NIHMS273928-supplement-1_si_001.pdf]

Supporting Information for

# Glutamic Acid 181 is Negatively Charged in the Bathorhodopsin Photointermediate of Visual Rhodopsin

*Megan N. Sandberg<sup>†</sup>, Tabitha L. Amora<sup>†</sup>, Lavoisier S. Ramos<sup>†</sup>,  
Min-Hsuan Chen<sup>‡,||</sup>, Barry E. Knox<sup>‡,||,\*</sup>, Robert R. Birge<sup>†,\*</sup>*

<sup>†</sup>Department of Chemistry, University of Connecticut

<sup>‡</sup>Department of Biochemistry and Molecular Biology,  
State University of New York Upstate Medical University

<sup>||</sup>Department of Ophthalmology, SUNY UMU

\*Address correspondence to either: Robert R. Birge, Phone: (860) 486-6720. Fax: (860) 486-2981. E-mail: rbirge@uconn.edu or Barry E. Knox, Phone: (315) 464-8719. Fax (315) 464-8750. E-mail: knoxb@upstate.edu

## Table of Contents

- I. Literature assignments of Glu-181 protonation state**
- II. Materials and experimental methods**
  - II.a. Visual pigment expression and purification*
  - II.b. Cryogenic electronic spectroscopy*
- III. Computational methods**
  - III.a. SAC-CI calculations*
  - III.b. MNDO-PSDCI calculations*

| <b>Figures</b> |                                                                                                                              |
|----------------|------------------------------------------------------------------------------------------------------------------------------|
| <b>S1</b>      | <i>Electrostatic map of bathorhodopsin with Glu-122(−) and His-211(+)</i>                                                    |
| <b>S2</b>      | <i>Level ordering of the low-lying excited singlet states of bathorhodopsin based on MNDO-PSDCI molecular orbital theory</i> |

| <b>Tables</b> |                                                                                 |
|---------------|---------------------------------------------------------------------------------|
| <b>S1</b>     | <i>Protonation state assignments of Glu181 in the dark state of rhodopsin</i>   |
| <b>S2</b>     | <i>SAC-CI Level Three 160 x 160 results for the rhodopsin binding site</i>      |
| <b>S3</b>     | <i>SAC-CI Level Three 160 x 160 results for the bathorhodopsin binding site</i> |
| <b>S4</b>     | <i>SAC-CI Level Three 190 x 190 results for the bathorhodopsin binding site</i> |
| <b>S5</b>     | <i>SAC-CI results for bathorhodopsin assuming Glu-122(−) and His-211(+)</i>     |
| <b>S6</b>     | <i>Key spectroscopic observations and the implication in terms of Glu-181</i>   |

## I. Literature protonation state assignments of Glu-181

The protonation state of Glu-181 has been the subject of over seventeen experimental and theoretical studies.<sup>1-17</sup> The key conclusions of these investigations are summarized in Table S1. An excellent overview of the theoretical work on this topic can be found in Ref. 17.

**Table S1.** Protonation state assignments for Glu-181 in the dark state of rhodopsin.

| Protonation state of E181 | Method of assignment                                     | Reference(s) |
|---------------------------|----------------------------------------------------------|--------------|
| Neutral                   | Pre-resonance Raman spectroscopy                         | 1            |
| Neutral                   | Two-Photon Spectroscopy                                  | 2            |
| Neutral                   | Low-temperature resonance Raman spectroscopy             | 3            |
| Neutral                   | CASSCF/CASPT2 calculations                               | 4            |
|                           |                                                          |              |
| Charged                   | NMR spectroscopy                                         | 5, 6, 7,8    |
| Charged                   | FT-IR spectroscopy                                       | 9, 10        |
| Charged                   | Explicit solvent MD simulations                          | 11           |
| Charged                   | Time-resolved UV-Vis spectroscopy                        | 12           |
| Charged                   | MD simulations with experimental <sup>2</sup> H NMR data | 13           |
| Charged                   | QM/MM simulations                                        | 14           |
| Charged                   | CASSCF/CASPT2 calculations                               | 15           |
|                           |                                                          |              |
| Inconclusive              | Microsecond-scale MD simulations                         | 16           |
| Inconclusive              | Three-layer ONIOM studies                                | 17           |

## II. Materials and experimental methods

### *II.a. Visual pigment expression and purification*

The pigments were constructed and isolated as previously reported.<sup>18</sup> The E181Q mutant was expressed in COS1 cells and purified by immunoaffinity chromatography techniques. The pigments were eluted in 1× buffer Y1 [50 mM HEPES, 140 mM NaCl, 3 mM MgCl<sub>2</sub>, pH 6.6] with 20 % glycerol and 0.1 % DM (*N*-dodecyl-β-D-maltoside).

### *II.b. Cryogenic Electronic Spectroscopy*

The spectra of native and E181Q bathorhodopsin were measured using our standard methods<sup>19-22</sup>, with additional care taken to accurately assign the photoconversion percentages. Samples were prepared in 67 % glycerol, 0.05 % *N*-dodecyl β-D-maltoside, and 1X buffer Y1 (see above). Experiments were performed at 10 K in a closed-cycle helium-refrigerated cryostat (APD, Inc.) inserted into the optical chamber of a Cary 50 UV-vis spectrophotometer. The 10 K temperature was chosen to prevent any formation of intermediates other than bathorhodopsin. In the case of E181Q, which has a batho photoproduct that is much less stable than in the native protein, a temperature below 20 K is required. To generate the photostationary states, samples were illuminated with a Photomax system equipped with a 200 W arc lamp and a monochromator (Oriel, Stratford, CT) tuned 20 nm to the blue of the absorption maximum of the resting (dark) state. The samples were illuminated until no further spectral changes could be observed.

Two methods were used to determine the composition of the photostationary state. The first method involved warming up the sample to ambient temperature to allow the formation of meta II, which has an absorption maximum for both rhodopsin and

E181Q rhodopsin at 380 nm. The resulting spectrum contains a mixture of dark state and meta II, separated in wavelength to a sufficient extent to permit reliable spectral deconvolution. The integral of the  $\lambda_{\text{max}}$  band, when compared to that observed for the pure dark state at the same temperature, permits accurate assignment of the amount of rhodopsin converted. For comparison, retinal oximes were extracted and analyzed using HPLC following the methods and procedures reported previously.<sup>19</sup> These two methods agreed to within 2 % and the results were averaged to obtain the fraction of species converted to the batho intermediate. Three such experiments were carried out and the batho spectra averaged (Figure 2). Worst-case errors in oscillator strength shifts and absorption maxima were assigned based on both the spectral and HPLC measurements.

### III. Computational Methods and Additional Discussion

All molecular orbital calculations other than the MNDO-PSDCI calculations were carried out using Gaussian-09.<sup>23</sup> The MNDO-PSDCI calculations were carried out using our own program.<sup>20-22,24</sup> The MNDO-PSDCI kernel (Windows XP/7, Mac OSX 10.4 or above) and a graphical-user interface (Anamol 5.4.8) are available by request from the author (rbirge@uconn.edu). Hydrogen atoms were added by using Anamol 5.4.8. Hydrogen atoms and chromophore geometries were optimized by using the B3LYP/6-31G(d) procedures<sup>25,26</sup> in Gaussian-09 while holding the non-chromophore heavy atoms at the crystal geometry coordinates. The glutamine residue was optimized by minimizing the two possible rotational geometries and selecting the geometry with the lower energy. The most stable glutamine configuration is shown in the insert at right. Figures 1-3, S1 and S2 were generated in mathscriptor 1.9.38 ([www.mathscriptor.org](http://www.mathscriptor.org)).

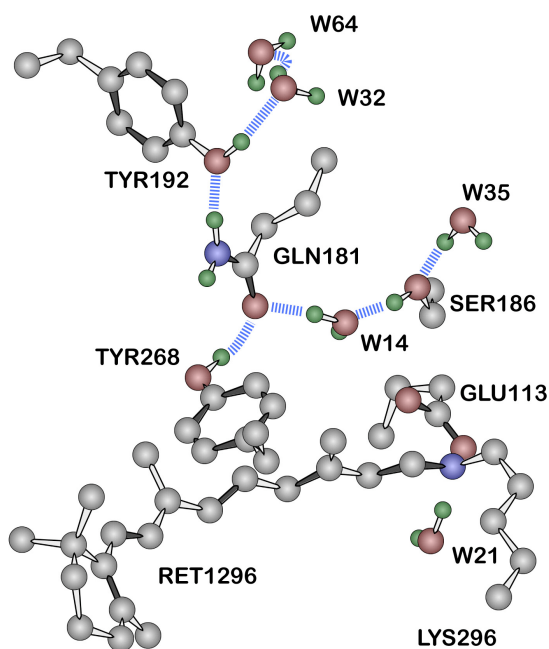

#### III.a. SAC-CI calculations

The symmetry-adapted-cluster configuration-interaction method (SAC-CI)<sup>27-30</sup> provides a reliable theoretical procedure for investigating the spectroscopic properties of isolated and protein-bound chromophores.<sup>27,31-34</sup> The strength of the method is the efficiency of the symmetry adapted cluster process which allows calculations to include a very large

configuration interaction (CI) basis set, both in terms of the number of configurations as well as the molecular size. Our calculations included the chromophore and all of the residues and water molecules shown in Figure 1. Some calculations included additional residues (see below and Figure S1). In all but one calculation, the CI basis set included the 160 highest energy filled molecular orbitals and the 160 lowest energy unfilled molecular orbitals and all possible single excitations. We refer to these as  $160 \times 160$  calculations. One calculation on bathorhodopsin included a larger basis set of the 190 highest energy filled molecular orbitals and the 190 lowest energy unfilled molecular orbitals. This bathorhodopsin calculation is referred to as the  $190 \times 190$  calculation and is shown in Table S2 and in Figure 3. Both the  $160 \times 160$  and  $190 \times 190$  bathorhodopsin calculations, when compared to the experimental data in Figure 2, strongly support a negatively charged Glu-181 residue. The analyses of the calculations on rhodopsin and bathorhodopsin are summarized in Table S6.

Unless stated otherwise, our calculations were carried out assuming Glu-122 and His-211 were both neutral, an assignment supported by FT-IR and NMR studies.<sup>35,36</sup> However, B3LYP/6-31G(d) calculations on the extended binding site (Figure S1) indicate that the total energy of the binding site is only  $\sim 1$  kcal/mol higher if both residues are charged and form a salt bridge [ $E_{\text{tot}}(\text{E122} \dots \text{H211}) = -3567.5497211$  Hartree;  $E_{\text{tot}}(\text{E122}^{(-)} \dots \text{H211}^{(+)}) = -3567.5481357$  Hartree]. Thus, for comparative purposes, we also carried out calculations including the Glu-122<sup>(-)</sup> and His-211<sup>(+)</sup> salt-bridge anticipating that proximity of these charged residues to the  $\beta$ -ionylidene ring of the chromophore might alter our conclusions. The results are shown in Table S5. While the presence of the salt-bridge generates red shifts in the  $\lambda_{\text{max}}$  bands, the shifts are nearly

identical for all three systems. Thus, correct assignment of the protonation state of these residues is not critical to the assignment of the protonation state of Glu-181. The observation that the salt-bridge model has a total energy nearly identical to a neutral pair suggests that the protonation states of these residues deserve further study.

As discussed in the main portion of this paper, analysis of the bathorhodopsin calculations clearly indicate that the SAC-CI calculations are consistent with a negatively charged Glu-181 and are inconsistent with a neutral Glu-181. However, we also carried out calculations on rhodopsin, which are presented in Table S2. These calculations also support a negatively charged Glu-181, but with a level of uncertainty discussed here. A portion of the ambiguity is intrinsic to the experimental observations (Figure 2). Although the absorption maxima of rhodopsin and E181Q are separated by 9 nm at room temperature, at 10 K these spectra are only separated by 4 nm. This observation is consistent with the Glu-181 residue being near to a nodal charge-shift line (Figure 1), and generates some ambiguity when using the spectral shifts to assign protonation state. Nevertheless, the SAC-CI calculations shown in Table S2 predict that a rhodopsin binding site with a neutral Glu-181 would undergo a large blue shift in E181Q. The fact that a small red shift is observed argues against a neutral Glu-181. The observed shift is consistent with the calculations for Glu-181<sup>(-)</sup>. Similarly, E181Q has a lower  $\lambda_{\text{max}}$  band oscillator strength than the native protein, which is also consistent with Glu-181<sup>(-)</sup> and inconsistent with a neutral Glu-181 residue (Table S2 and Figure 2). Comparison of the calculated and observed higher energy bands is difficult because the intensities appear to be temperature dependent or obscured by the broad  $\lambda_{\text{max}}$  band. Thus, while comparison of calculated and observed properties of the  $\lambda_{\text{max}}$  band favor the Glu-181<sup>(-)</sup> assignment,

the assignment for rhodopsin is far less compelling than the comparable assignment for bathorhodopsin. The salient conclusions of the SAC-CI calculations for both rhodopsin and bathorhodopsin are summarized in Table S6.

### *IIIb. MNDO-PSDCI calculations.*

Although we do not suggest that semiempirical methods are optimal for the present study, we include the results of MNDO-PSDCI calculations here because these calculations provide additional perspective. Indeed, MNDO-PSDCI survey calculations were responsible for convincing us that Glu-181 was likely charged in bathorhodopsin and prompted the use of higher-level SAC-CI calculations to explore the problem in more detail. The MNDO-PSDCI methods used here are identical to those used in previous studies of the binding sites of rhodopsin and various cone pigments.<sup>20-22,24</sup> The present set of calculations included the chromophore and all residues within 5.6 Å of the chromophore. We assumed that Glu-122 and His-211 were both neutral. Previous studies have shown that MNDO-PSDCI methods provide good agreement with the experimental absorption spectra of rhodopsin and the cone pigments.<sup>20-22,24</sup> However, because the configuration interaction is limited to the chromophore, the oscillator strengths will not be calculated with accuracy and cannot be used to make assignments. This observation follows from the fact that the oscillator strength is very sensitive to configuration interaction between the chromophore and nearby aromatic residues.<sup>37</sup> Such interactions, while included in the SAC-CI calculations discussed above, are beyond the capability of our program when the full binding site is included. The MNDO-PSDCI results are shown in Figure S2.

The calculated transition energies predicted by the MNDO-PSDCI calculations are more consistent with a charged Glu-181 than a neutral Glu-181. These calculations predict no observable shift in absorption maximum in going from Glu-181 (neutral) to Gln-181 (E181Q). In contrast, these calculations predict a significant red shift in going from Glu-181<sup>(-)</sup> to Gln-181 (Figure S2), which is experimentally observed (Figure 2), although the experimental shift is smaller than calculated. The MNDO-PSDCI calculations also match the energy and intensity shifts observed in the higher energy bands better if we assume Glu-181<sup>(-)</sup> rather than Glu-181(neutral). Thus, these calculations add support for our conclusion that Glu-181 is negatively charged in bathorhodopsin.

**Table S2.** SAC-CI Level Three (160 x 160) results for dark (resting) state of rhodopsin.<sup>a-c</sup>

| System   | S# | $\Delta E$ (eV) | $\lambda_{\max}$ (nm) | <b>f</b> | %Doubles | $\Delta\mu$ (D) |
|----------|----|-----------------|-----------------------|----------|----------|-----------------|
| E181 (0) | S1 | 2.8878          | 429.39                | 1.2597   | 9.96     | 20.9115         |
| E181 (0) | S2 | 4.2203          | 293.82                | 0.0335   | 12.80    | 27.9702         |
| E181 (0) | S3 | 4.3396          | 285.74                | 0.0066   | 11.27    | 14.2711         |
| E181 (0) | S4 | 4.3576          | 284.56                | 0.2893   | 27.24    | 18.2983         |
| E181 (0) | S5 | 4.3766          | 283.32                | 0.0021   | 10.69    | 14.8677         |
| E181 (0) | S6 | 4.8427          | 256.06                | 0.0002   | 10.57    | 17.7251         |
| E181 (0) | S7 | 5.2914          | 234.34                | 0.0233   | 9.46     | 9.6786          |
| E181 (0) | S8 | 5.5824          | 222.13                | 0.1482   | 28.30    | 9.7634          |
| E181Q    | S1 | 3.2114          | 386.12                | 1.2654   | 9.71     | 23.2245         |
| E181Q    | S2 | 4.4277          | 280.06                | 0.4036   | 33.54    | 17.5604         |
| E181Q    | S3 | 4.6253          | 268.09                | 0.0003   | 10.08    | 15.9110         |
| E181Q    | S4 | 4.7072          | 263.43                | 0.0002   | 10.47    | 16.0541         |
| E181Q    | S5 | 4.8353          | 256.45                | 0.0483   | 12.20    | 25.4538         |
| E181Q    | S6 | 5.1620          | 240.22                | 0.0003   | 10.01    | 18.4528         |
| E181Q    | S7 | 5.2758          | 235.04                | 0.0264   | 9.52     | 10.7097         |
| E181Q    | S8 | 5.6075          | 221.13                | 0.1712   | 28.65    | 10.2178         |
| E181 (-) | S1 | 3.2279          | 384.15                | 1.3589   | 9.39     | 31.0148         |
| E181 (-) | S2 | 4.2950          | 288.71                | 0.0025   | 10.87    | 30.3509         |
| E181 (-) | S3 | 4.4266          | 280.12                | 0.2821   | 40.22    | 23.1667         |
| E181 (-) | S4 | 4.9699          | 249.50                | 0.2945   | 22.72    | 28.2171         |
| E181 (-) | S5 | 4.9956          | 248.22                | 0.0010   | 10.09    | 19.0919         |
| E181 (-) | S6 | 5.2234          | 237.39                | 0.0265   | 9.72     | 20.4790         |
| E181 (-) | S7 | 5.4370          | 228.07                | 0.1408   | 22.37    | 19.1584         |
| E181 (-) | S8 | 5.4557          | 227.29                | 0.0970   | 12.38    | 19.6973         |

- (a) **System** identifies the state or substitution of the Glu-181 residue, **S#** identifies the excited singlet state,  **$\Delta E$ (eV)** column gives the transition energy in eV,  **$\lambda_{\max}$  (nm)** gives the wavelength in nm [ $\lambda(\text{nm}) \approx 1240/\Delta E(\text{eV})$ ], **f** is the one-photon oscillator strength, **%Doubles** is the percentage of doubly excited configurations present in the SAC-CI solution for the given excited state and  **$\Delta\mu$  (D)** is the change in dipole moment associated with the excitation in Debyes. Note the E181(0) indicates Glu-181 uncharged and E181(-) indicates Glu-181 negatively charged. E181Q indicates the substitution of Glu-181 by Gln-181.
- (b) Glu-122 and His-211 were not included in this calculation.
- (c) The calculations included the highest energy 160 occupied molecular orbitals and the 160 lowest energy unoccupied molecular orbitals, with single and double excitation configuration interaction based on level three (maximum CISD) selection. The excited state calculations included 25,600 singles. The number of doubles varied for the three systems; 424,461 doubles for E181(0), 41,780 doubles for E181Q, and 386,363 doubles for E181(-).

**Table S3.** SAC-CI Level Three ( $160 \times 160$ ) results for the bathorhodopsin binding site.<sup>a-d</sup>

| System   | S# | $\Delta E$ (eV) | $\lambda_{\max}$ (nm) | f      | % Doubles | $\Delta\mu$ (D) |
|----------|----|-----------------|-----------------------|--------|-----------|-----------------|
| E181 (0) | S1 | 2.2201          | 558.53                | 1.3917 | 37.35     | 22.8270         |
| E181 (0) | S2 | 3.3591          | 369.15                | 0.0719 | 46.72     | 10.9292         |
| E181 (0) | S3 | 4.1455          | 299.12                | 0.0009 | 12.14     | 28.3009         |
| E181 (0) | S4 | 4.3065          | 287.94                | 0.0179 | 17.66     | 18.0629         |
| E181 (0) | S5 | 4.4816          | 276.69                | 0.2885 | 18.68     | 17.5642         |
| E181 (0) | S6 | 4.7924          | 258.74                | 0.0000 | 12.22     | 53.3397         |
| E181 (0) | S7 | 5.2643          | 235.55                | 0.0279 | 9.60      | 13.3119         |
| E181 (0) | S8 | 5.5483          | 223.49                | 0.0402 | 32.52     | 10.2974         |
| E181Q    | S1 | 2.3287          | 532.49                | 1.4519 | 36.13     | 32.0784         |
| E181Q    | S2 | 3.3215          | 373.32                | 0.0652 | 48.07     | 15.2872         |
| E181Q    | S3 | 4.0920          | 303.03                | 0.0003 | 14.13     | 15.5777         |
| E181Q    | S4 | 4.1621          | 297.93                | 0.0006 | 13.97     | 14.1559         |
| E181Q    | S5 | 4.3223          | 286.88                | 0.0430 | 30.14     | 14.3593         |
| E181Q    | S6 | 4.5650          | 271.63                | 0.2548 | 17.32     | 26.0128         |
| E181Q    | S7 | 4.7693          | 260.00                | 0.0031 | 13.62     | 15.9044         |
| E181Q    | S8 | 5.4939          | 225.70                | 0.0467 | 33.58     | 15.7993         |
| E181 (-) | S1 | 2.5190          | 492.26                | 1.5967 | 20.30     | 38.0034         |
| E181 (-) | S2 | 3.5726          | 347.09                | 0.0177 | 50.02     | 25.2856         |
| E181 (-) | S3 | 3.8349          | 323.35                | 0.0003 | 10.99     | 34.4705         |
| E181 (-) | S4 | 4.2788          | 289.80                | 0.0001 | 13.16     | 16.9949         |
| E181 (-) | S5 | 4.6610          | 266.04                | 0.3258 | 14.68     | 32.0909         |
| E181 (-) | S6 | 4.7496          | 261.07                | 0.0000 | 11.90     | 45.6349         |
| E181 (-) | S7 | 5.2362          | 236.81                | 0.0329 | 9.43      | 27.0817         |
| E181 (-) | S8 | 5.6232          | 220.52                | 0.0492 | 31.88     | 25.1781         |

<sup>(a)</sup> See (a) of Table S2

<sup>(b)</sup> The calculations included the highest energy 160 occupied molecular orbitals and the 160 lowest energy unoccupied molecular orbitals, with single and double excitation configuration interaction based on level three (maximum CISD) selection.

<sup>(c)</sup> Glu-122 and His-211 were not included in this calculation.

<sup>(d)</sup> The excited state calculations included 25,600 singles and ~477,000 doubles. The number of doubles varied slightly for the three systems.

**Table S4.** SAC-CI Level Three (190 x 190) results for the bathorhodopsin binding site.<sup>a-d</sup>

| System   | S# | $\Delta E$ (eV) | $\lambda_{\max}$ (nm) | f      | % Doubles | $\Delta\mu$ (D) |
|----------|----|-----------------|-----------------------|--------|-----------|-----------------|
| E181 (0) | S1 | 2.2234          | 557.63                | 1.1356 | 58.77     | 25.2059         |
| E181 (0) | S2 | 3.3451          | 370.64                | 0.0600 | 48.90     | 10.8822         |
| E181 (0) | S3 | 3.9857          | 311.07                | 0.0010 | 11.45     | 28.7422         |
| E181 (0) | S4 | 4.0389          | 306.98                | 0.0000 | 13.41     | 2238364         |
| E181 (0) | S5 | 4.2698          | 290.37                | 0.1913 | 22.04     | 11.8657         |
| E181 (0) | S6 | 4.6040          | 269.30                | 0.0000 | 12.01     | 53.1815         |
| E181 (0) | S7 | 5.1931          | 238.75                | 0.0325 | 9.41      | 13.3464         |
| E181 (0) | S8 | 5.2785          | 234.89                | 0.0001 | 11.04     | 25.5029         |
| E181Q    | S1 | 2.3868          | 519.46                | 1.1268 | 62.15     | 35.2717         |
| E181Q    | S2 | 3.3392          | 371.30                | 0.0338 | 54.92     | 14.9196         |
| E181Q    | S3 | 3.8976          | 318.10                | 0.0000 | 13.35     | 14.4767         |
| E181Q    | S4 | 3.9994          | 310.01                | 0.0002 | 13.12     | 15.5927         |
| E181Q    | S5 | 4.2660          | 290.63                | 0.0829 | 26.79     | 17.3824         |
| E181Q    | S6 | 4.4867          | 276.34                | 0.2088 | 21.87     | 23.9277         |
| E181Q    | S7 | 4.6888          | 264.43                | 0.0025 | 13.03     | 16.1436         |
| E181Q    | S8 | 5.5076          | 225.11                | 0.0438 | 32.97     | 15.5776         |
| E181 (-) | S1 | 2.4522          | 505.60                | 1.3541 | 30.81     | 40.5885         |
| E181 (-) | S2 | 3.5664          | 347.65                | 0.0188 | 51.86     | 25.4671         |
| E181 (-) | S3 | 3.6412          | 340.50                | 0.0003 | 11.16     | 33.9500         |
| E181 (-) | S4 | 4.0444          | 306.56                | 0.0001 | 12.97     | 17.0249         |
| E181 (-) | S5 | 4.5446          | 272.82                | 0.0064 | 12.29     | 44.2057         |
| E181 (-) | S6 | 4.5456          | 272.76                | 0.2798 | 16.08     | 28.5933         |
| E181 (-) | S7 | 5.1547          | 240.53                | 0.0383 | 9.31      | 27.3145         |
| E181 (-) | S8 | 5.6039          | 221.25                | 0.0542 | 30.77     | 25.2587         |

<sup>(a)</sup> See (a) of Table S2

<sup>(b)</sup> The calculations included the 190 highest energy occupied molecular orbitals and the 190 lowest energy unoccupied molecular orbitals, with single and double excitation configuration interaction based on level three (maximum CISD) selection.

<sup>(c)</sup> Glu-122 and His-211 were not included in this calculation.

<sup>(d)</sup> The excited state calculations included 36,100 singlets. The number of doubles varied slightly for the three systems; 612,115 doubles for E181 (0), 549,403 doubles for E181Q, and 615,589 doubles for E181 (-).

**Table S5.** SAC-CI Level One results for the bathorhodopsin binding site including Glu-122(-) and His-211(+).<sup>a-c</sup>

| System   | S# | $\Delta E$ (eV) | $\lambda_{\max}$ (nm) | f      | % Doubles | $\Delta\mu$ (D) |
|----------|----|-----------------|-----------------------|--------|-----------|-----------------|
| E181 (0) | S1 | 1.9874          | 623.93                | 1.5349 | 19.48     | 37.1691         |
| E181 (0) | S2 | 2.8856          | 429.72                | 0.0001 | 12.75     | 12.7476         |
| E181 (0) | S3 | 3.0256          | 409.84                | 0.0047 | 13.28     | 13.5210         |
| E181 (0) | S4 | 3.3671          | 368.27                | 0.0090 | 16.07     | 11.9652         |
| E181 (0) | S5 | 3.3963          | 365.10                | 0.0806 | 42.98     | 37.9423         |
| E181 (0) | S6 | 4.5230          | 274.15                | 0.0082 | 33.24     | 43.6625         |
| E181 (0) | S7 | 4.6458          | 266.91                | 0.0069 | 13.84     | 55.0162         |
| E181 (0) | S8 | 5.3045          | 233.76                | 0.0254 | 10.09     | 41.0157         |
| E181Q    | S1 | 2.0734          | 598.05                | 1.4588 | 29.64     | 37.3715         |
| E181Q    | S2 | 3.0267          | 409.69                | 0.0002 | 12.68     | 23.7678         |
| E181Q    | S3 | 3.1737          | 390.71                | 0.0048 | 13.37     | 23.6389         |
| E181Q    | S4 | 3.4070          | 363.96                | 0.0748 | 47.80     | 40.6779         |
| E181Q    | S5 | 3.4963          | 354.66                | 0.0006 | 13.16     | 22.0333         |
| E181Q    | S6 | 4.3666          | 283.97                | 0.4059 | 19.84     | 39.8766         |
| E181Q    | S7 | 4.9423          | 250.90                | 0.0034 | 13.01     | 57.7902         |
| E181Q    | S8 | 5.4647          | 226.91                | 0.0429 | 9.66      | 41.4911         |
| E181 (-) | S1 | 2.2376          | 554.16                | 1.5660 | 19.68     | 14.3122         |
| E181 (-) | S2 | 3.5368          | 350.60                | 0.0363 | 37.26     | 8.5988          |
| E181 (-) | S3 | 3.5534          | 348.96                | 0.0175 | 26.41     | 14.4322         |
| E181 (-) | S4 | 3.6740          | 337.51                | 0.0019 | 15.41     | 22.7570         |
| E181 (-) | S5 | 4.0078          | 309.40                | 0.0005 | 13.51     | 26.4602         |
| E181 (-) | S6 | 4.1733          | 297.13                | 0.0015 | 12.55     | 34.2387         |
| E181 (-) | S7 | 4.4176          | 280.70                | 0.2663 | 24.57     | 14.7990         |
| E181 (-) | S8 | 5.2351          | 236.86                | 0.0316 | 10.06     | 17.6122         |

<sup>(a)</sup> See (a) of Table S2

<sup>(b)</sup> Glu-122(-) and His-211(+) were included in this calculation (see Fig. S1).

<sup>(c)</sup> The calculations included the highest energy 160 occupied molecular orbitals and the 160 lowest energy unoccupied molecular orbitals, with single and double excitation configuration interaction based on level one (minimum CISD) selection. The excited state calculations included 25,600 singles and ~61,000 doubles. The number of doubles varied slightly for the three systems.

**Table S6.** Key spectroscopic observations and the implications in terms of the protonation state of Glu-181 in the dark (resting) state and the primary stable photoproduct, Bathorhodopsin.

| State <sup>(a)</sup> | Characteristic <sup>(b)</sup>                      | Observation <sup>(c)</sup>                           | Conclusion <sup>(d)</sup> |
|----------------------|----------------------------------------------------|------------------------------------------------------|---------------------------|
| <i>rho</i>           | Transition energy shift ( $\lambda_{\max}$ )       | $\Delta E(\text{E181Q}) < \Delta E(\text{native})$   | $\sim \text{E181(-)}$     |
| <i>rho</i>           | Oscillator strength shift ( $\lambda_{\max}$ )     | $f(\text{E181Q}) < f(\text{native})$                 | $\sim \text{E181(-)}$     |
| <i>rho</i>           | Oscillator strength shifts ( <i>higher bands</i> ) | $f(\text{E181Q}) \sim f(\text{native})$              | <i>Ambiguous</i>          |
| <i>batho</i>         | Transition energy shift ( $\lambda_{\max}$ )       | $\Delta E(\text{E181Q}) \ll \Delta E(\text{native})$ | $\text{E181(-)}$          |
| <i>batho</i>         | Oscillator strength shift ( $\lambda_{\max}$ )     | $f(\text{E181Q}) < f(\text{native})$                 | $\sim \text{E181(-)}$     |
| <i>batho</i>         | Oscillator strength shifts ( <i>higher bands</i> ) | $f(\text{E181Q}) > f(\text{native})$                 | $\text{E181(-)}$          |

- (a) The term “*rho*” refers to the resting (dark) state and “*batho*” refers to the stable, primary photoproduct, of either the native bovine rhodopsin or the E181Q mutant.
- (b) The experimental data are from Figure 2.
- (c) Observations involving  $\Delta E$  refer to changes in the Franck-Condon maximum of the low-energy, strongly allowed  $\lambda_{\max}$  band. Observations involving  $f$  refer to the oscillator strength of the low-energy, strongly allowed  $\lambda_{\max}$  band or higher energy bands as assigned under “Characteristic”. “Native” refers to the native (wild-type) bovine rhodopsin.
- (d) Conclusion refers to the assignment based on comparison of the observed (Figure 2) and calculated (Figure 3 and Tables S2-S5) results. When preceded with “ $\sim$ ”, the assignment is tentative because the observation involved differences that are below or very close to the resolution/reliability of the SAC-CI calculations. E181(-) indicates a conclusion that Glu-181 is negatively charged in the state listed in the first column.

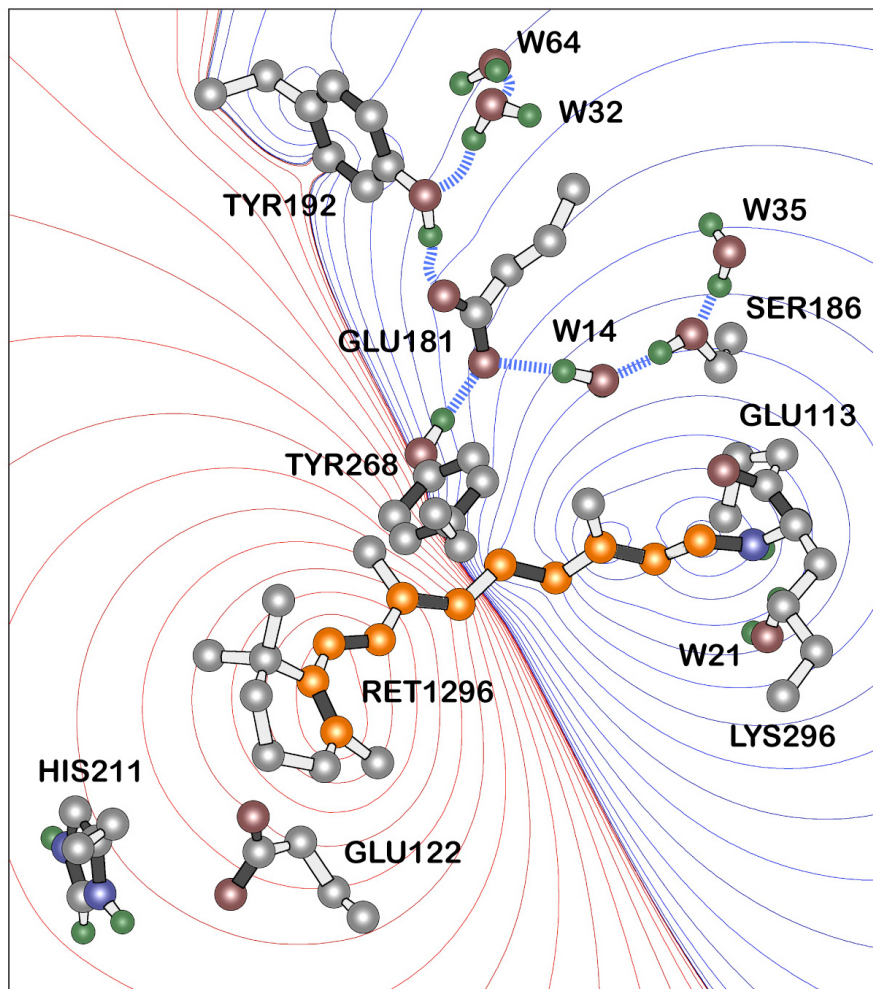

**Figure S1.** Charge shift upon excitation of the chromophore in bathorhodopsin into the lowest-lying strongly allowed  ${}^1B_u^+$ -like excited singlet state based on SAC-CISD calculations in which Glu-122(-) and His-211(+) are included in the calculation. Red contours indicate regions of increased positive charge, and blue contours, regions of increased negative charge. The contours are drawn at the following first-order electrostatic energies: 0 (black),  $\pm 0.282$ ,  $\pm 2.26$ ,  $\pm 7.63$ ,  $\pm 18$ ,  $\pm 35.3$ ,  $\pm 61$ ,  $\pm 96.9$ ,  $\pm 144$ ,  $\pm 206$ ,  $\pm 282$ ,  $\pm 376$ ,  $\pm 488$ ,  $\pm 621$ ,  $\pm 775$  kJ/mol. Key hydrogen bonds are indicated with blue dashed lines, and the polyene atoms of the retinal chromophore are shown in orange and numbered following convention. The heavy atom coordinates of the binding sites were taken from the 2G87 crystal structure of bathorhodopsin.<sup>38</sup> Waters are labeled using the PDB numbers minus 2000. Only polar hydrogen atoms are shown, but all hydrogen atoms were included in the calculations and were optimized along with the chromophore by using B3LYP/6-31G(d) procedures. The calculations for Glu-181(-), Glu-181(neutral) and E181Q are presented in Table S5. His-211(+) generates a small blue shift, and Glu-122(-) a larger red shift, because it is closer to the chromophore. The two residues combine to generate a small red shift.

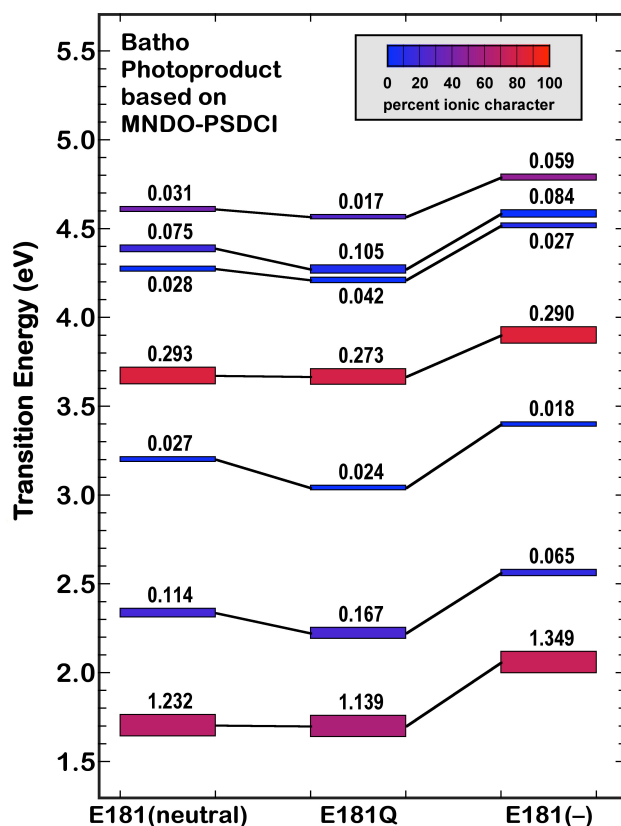

**Figure S2.** Level ordering of the low-lying excited singlet states of bathorhodopsin based on MNDO-PSDCI molecular orbital theory for three cases: Glu-181 neutral (left), E181Q (middle) and Glu-181 negatively charged (right). The calculations included full single and double CI within the  $\pi$  system of the chromophore. The covalent versus ionic character of the state is indicated by the color of the state marker and varies from blue (covalent) to red (ionic) based on the scale shown at top left. The oscillator strength of the electronic transition from the ground state is written directly above or below the state marker. The oscillator strengths are only correct to first order because the configuration interaction is limited to the chromophore.

## References:

- (1) Yan, E. C. Y.; Kazmi, M. A.; Ganim, Z.; Hou, J.-M.; Pan, D.; Chang, B. S. W.; Sakmar, T. P.; Mathies, R. A. *Proc. Natl. Acad. Sci. USA* **2003**, *100*, 9262-9267.
- (2) Birge, R. R.; Murray, L. P.; Pierce, B. M.; Akita, H.; Balogh-Nair, V.; Findsen, L. A.; Nakanishi, K. *Proc. Natl. Acad. Sci. USA* **1985**, *82*, 4117-4121.
- (3) Yan, E. C. Y.; Ganim, Z.; Kazmi, M. A.; Chang, B. S. W.; Sakmar, T. P.; Mathies, R. A. *Biochemistry* **2004**, *43*, 10867-10876.
- (4) Sekharan, S.; Buss, V. *J. Am. Chem. Soc.* **2008**, *130*, 17220-17221.
- (5) Mollevanger, L. C.; Kentgens, A. P.; Pardoën, J. A.; Courtin, J. M.; Veeman, W. S.; Lugtenburg, J.; de Grip, W. J. *Eur. J. Biochem.* **1987**, *163*, 9-14.
- (6) Smith, S. O.; Palings, I.; Miley, M. E.; Courtin, J. M.; de Groot, H.; Lugtenburg, J.; Mathies, R. A.; Griffin, R. G. *Biochemistry* **1990**, *29*, 8158-8164.
- (7) Han, M.; Smith, S. O. *Biochemistry* **1995**, *34*, 1425-1432.
- (8) Honig, B.; Dinur, U.; Nakanishi, K.; Balogh-Nair, V.; Gawinowicz, M. A.; Arnaboldi, M.; Motto, M. G. *J. Am. Chem. Soc.* **1979**, *101*, 7084-7086.
- (9) Nagata, T.; Terakita, A.; Kandori, H.; Shichida, Y.; Maeda, A. *Biochemistry* **1998**, *37*, 17216-17222.
- (10) Lüdeke, S.; Beck, M.; Yan, E. C. Y.; Sakmar, T. P.; Siebert, F.; Vogel, R. *J. Mol. Biol.* **2005**, *353*, 345-356.
- (11) Röhrig, U. F.; Guidoni, L.; Rothlisberger, U. *Biochemistry* **2002**, *41*, 10799-10809.
- (12) Lewis, J. W.; Szundi, I.; Kazmi, M. A.; Sakmar, T. P.; Kliger, D. S. *Biochemistry* **2004**, *43*, 12614-12621.
- (13) Martínez-Mayorga, K.; Pitman, M. C.; Grossfield, A.; Feller, S. E.; Brown, M. F. *J. Am. Chem. Soc.* **2006**, *128*, 16502-16503.
- (14) Frähmcke, J. S.; Wanko, M.; Phatak, P.; Mrogiński, M. A.; Elstner, M. *J. Phys. Chem. B* **2010**, *114*, 11338-11352.
- (15) Tomasello, G.; Olaso-González, G.; Altoè, P.; Stenta, M.; Serrano-Andrés, L.; Merchán, M.; Orlandi, G.; Bottoni, A.; Garavelli, M. *J. Am. Chem. Soc.* **2009**, *131*, 5172-5186.
- (16) Grossfield, A.; Pitman, M. C.; Feller, S. E.; Soubias, O.; Gawrisch, K. *J. Mol. Biol.* **2008**, *381*, 478-486.
- (17) Hall, K. F.; Vreven, T.; Frisch, M. J.; Bearpark, M. J. *J. Mol. Biol.* **2008**, *383*, 106-121.
- (18) Babu, K. R.; Dukupati, A.; Birge, R. R.; Knox, B. E. *Biochemistry* **2001**, *40*, 13760-13766.
- (19) Vought, B. W.; Dukupati, A.; Max, M.; Knox, B. E.; Birge, R. R. *Biochemistry* **1999**, *38*, 11287-11297.
- (20) Kusnetzow, A.; Dukupati, A.; Babu, K. R.; Singh, D.; Vought, B. W.; Knox, B. E.; Birge, R. R. *Biochemistry* **2001**, *40*, 7832-7844.
- (21) Ramos, L. S.; Chen, M. H.; Knox, B. E.; Birge, R. R. *Biochemistry* **2007**, *46*, 5330-5340.
- (22) Kusnetzow, A. K.; Dukupati, A.; Babu, K. R.; Ramos, L.; Knox, B. E.; Birge, R. R. *Proc. Natl. Acad. Sci. USA* **2004**, *101*, 941-6.

- (23) Frisch, M. J. T., G. W.; Schlegel, H. B.; Scuseria, G. E.; Robb, M. A.; Cheeseman, J. R.; Scalmani, G.; Barone, V.; Mennucci, B.; Petersson, G. A.; Nakatsuji, H.; Caricato, M.; Li, X.; Hratchian, H. P.; Izmaylov, A. F.; Bloino, J.; Zheng, G.; Sonnenberg, J. L.; Hada, M.; Ehara, M.; Toyota, K.; Fukuda, R.; Hasegawa, J.; Ishida, M.; Nakajima, T.; Honda, Y.; Kitao, O.; Nakai, H.; Vreven, T.; Montgomery, Jr., J. A.; Peralta, J. E.; Ogliaro, F.; Bearpark, M.; Heyd, J. J.; Brothers, E.; Kudin, K. N.; Staroverov, V. N.; Kobayashi, R.; Normand, J.; Raghavachari, K.; Rendell, A.; Burant, J. C.; Iyengar, S. S.; Tomasi, J.; Cossi, M.; Rega, N.; Millam, N. J.; Klene, M.; Knox, J. E.; Cross, J. B.; Bakken, V.; Adamo, C.; Jaramillo, J.; Gomperts, R.; Stratmann, R. E.; Yazyev, O.; Austin, A. J.; Cammi, R.; Pomelli, C.; Ochterski, J. W.; Martin, R. L.; Morokuma, K.; Zakrzewski, V. G.; Voth, G. A.; Salvador, P.; Dannenberg, J. J.; Dapprich, S.; Daniels, A. D.; Farkas, Ö.; Foresman, J. B.; Ortiz, J. V.; Cioslowski, J.; Fox, D. J. Gaussian, Inc., Wallingford CT, 2009. In *Revision A.1*; Gaussian, Inc., Wallingford CT: 2009.
- (24) Amora, T. L.; Ramos, L. S.; Galan, J. F.; Birge, R. R. *Biochemistry* **2008**, *47*, 4614-4620.
- (25) Becke, A. D. *J. Phys. Chem.* **1993**, *98*, 5648-5652.
- (26) Lee, C.; Yang, W.; Parr, R. G. *Phys. Rev. B: Condens. Matter* **1988**, *37*, 785-9.
- (27) Nakajima, T.; Nakatsuji, H. *Chem. Phys.* **1999**, *242*, 177-193.
- (28) Nakatsuji, H. *Chem. Phys. Lett.* **1978**, *59*, 362-4.
- (29) Nakatsuji, H.; Hirao, K. *J. Chem. Phys.* **1978**, *68*, 2053-65.
- (30) Nakatsuji, H. *Chem. Phys. Lett.* **1991**, *177*, 331-7.
- (31) Ishida, M.; Toyota, K.; Ehara, M.; Frisch, M. J.; Nakatsuji, H. *J. Chem. Phys.* **2004**, *120*, 2593-2605.
- (32) Miyahara, T.; Tokita, Y.; Nakatsuji, H. *J. Phys. Chem. B* **2001**, *105*, 7341-7352.
- (33) Miyahara, T.; Nakatsuji, H.; Hasegawa, J.; Osuka, A.; Aratani, N.; Tsuda, A. *J. Chem. Phys.* **2002**, *117*, 11196-11206.
- (34) Premvardhan, L.; Sandberg, D. J.; Fey, H.; Birge, R. R.; Buchel, C.; Grondelle, R. v. *J. Phys. Chem. B* **2008**, *112*, 11838-11853.
- (35) Fahmy, K.; Jäger, F.; Beck, M.; Zvyaga, T. A.; Sakmar, T. P.; Siebert, F. *Proc. Natl. Acad. Sci. USA* **1993**, *90*, 10206-10210.
- (36) Patel, A. B.; Crocker, E.; Reeves, P. J.; Getmanova, E. V.; Eilers, M.; Khorana, H. G.; Smith, S. O. *J. Mol. Biol.* **2005**, *347*, 803-812.
- (37) Ren, L.; Martin, C. H.; Wise, K. J.; Gillespie, N. B.; Luecke, H.; Lanyi, J. K.; Spudich, J. L.; Birge, R. R. *Biochemistry* **2001**, *40*, 13906-13914.
- (38) Nakamichi, H.; Okada, T. *Angew. Chem., Int. Ed.* **2006**, *45*, 4270-4273.
